# Supplementary material for: MicroRNA Discovery and Analysis of Pinewood Nematode Bursaphelenchus xylophilus by Deep Sequencing
Source: PLoS One. 2010 Oct 12;5(10):e13271. doi: 10.1371/journal.pone.0013271 (PMC2953492; doi:10.1371/journal.pone.0013271)
Supplement: Table S3 — Details of 57 experimentally verified miRNAs and their precursors of B. xylophilus. (0.03 MB XLS) [file pone.0013271.s005.xls]

## Sheet: Sheet1
Supplemental Table S3 Details of 57 exprementally verified miRNAs and their precursors of B. xylophilus
Name	Seed	Mature miRNA sequence	Precursor sequence	Expression abundance in each library (counts/Mb)					Homologue(s)	Verification method
				ZJ	ZJ-COLD	ZJ-DJ3	CAN	USA
bxy-let-7	GAGGUA	UGAGGUAGUAGGUUGUAUAGUU	UGAGGUAGUAGGUUGUAUAGUUCGCGUAUUAUCAUUGGAGGUAACUGUGCAAUCUGCUAGCUUACC	544.71	1850.43	746.06	519.12	748.66	cel-let-7, cel-miR-48/84/241/795	PCR
bxy-miR-1	GGAAUG	UGGAAUGUAAAGAAGUAUGUAG	GCGUACUUCUUUCCAGUUCCAUACUAUUUUGUCAUGGCUAUGGAAUGUAAAGAAGUAUGUAG	1797.54	5479.63	984.05	2076.84	1571.42	cel-miR-1	PCR
bxy-miR-100	ACCCGU	AACCCGUAGAUCCGAACUUGUGU	AACCCGUAGAUCCGAACUUGUGUUUUUAAUGUUGAGAUAACACAGGCUUCGGAGCCGGGUCGU	10348.5	268.51	183.58	9717.14	12757.6	dme-miR-100, cel-miR-51/52/53/54/55/56	PCR
bxy-miR-124	AAGGCA	UAAGGCACGCGGUGAAAGCCA	GCCUUCACUCAGUGACCUUAGUGUGCCCUCAGGGCAAAUUUUAUUGACUAAGGCACGCGGUGAAAGCCA	88.39	89.77	111.71	89.08	75.99	cel-miR-124	PCR
bxy-miR-1822	AGCUGC	AAGCUGCCAAAGAAAGGCCGA	CGUCUUUCCUAUGGCAACUUAUGGUUUAAUUGGUGAUCCAAGCUGCCAAAGAAAGGCCGA	1.9	1.72	2.48	2.64	0.85	cel-miR-1822	PCR
bxy-miR-184	GGACGG	UGGACGGAAGUCUGAUAAGGAGC	GCUUAUCAGCUUCUGGUCCCGUCUGAUCACUCGGGUGUACUGGACGGAAGUCUGAUAAGGAGC	43.33	65.73	4.78	35.15	34.98	dme-miR-184，hsa-miR-184	PCR
bxy-miR-2	AUCACA	UAUCACAGCCAGCUUUGAUGUA	UGUCAAAGUGGAAGUGAUUUGCCGCUGUUGAAAGUAUGGGUCCAUAUCACAGCCAGCUUUGAUGUA	112.86	28.85	20.72	112.8	81.44	cel-miR-2/43	PCR
bxy-miR-234	UAUUGC	UUAUUGCUCGAGAAUACAAAUU	UGGGUAUUCUCUGGCAAUGGACAGAAACGAUUUAGACUGUUAUUGCUCGAGAAUACAAAUU	1.65	2.41	0.59	3.91	1.63	cel-miR-234	PCR
bxy-miR-234*△	GGGUAU	UGGGUAUUCUCUGGCAAUGGACA	UGGGUAUUCUCUGGCAAUGGACAGAAACGAUUUAGACUGUUAUUGCUCGAGAAUACAAAUU	1.76	0.82	0.56	1.05	1	--	PCR
bxy-miR-236	AAUACU	UAAUACUGUCAGGUAACGAUGAA	CAUCUUGCCUCACAGUAAUUGGACUAGUCUUUGAUGGAUCUAAUACUGUCAGGUAACGAUGAA	72.81	65.86	0.49	54.15	91.73	cel-miR-236, dme-miR-8	PCR
bxy-miR-242	UGCGUA	UUGCGUAGGCAUUUGAUACGA	UUGCGUAGGCAUUUGAUACGAUGGAUUCGCAACAUAGACUUCGUGGCAAAUGUCUGAGCAAAA	22.61	21.02	2.35	21.59	20.44	cel-miR-242	PCR
bxy-miR-252	UAAGUA	CUAAGUAGUAGUGCCGCAGGUAA	CUAAGUAGUAGUGCCGCAGGUAACUGGCAAAAGGAGAUUACCUGUGCACCGCUCCUUAACC	35.55	73.84	23.98	34.18	45.51	cel-miR-251/252	PCR
bxy-miR-277	AAAUGC	CAAAUGCACCAAUCUGGUACGA	GUGCAGAGUGGGGCAUUUACGAUAUAAAAACGAUUGCGUACGCAAAUGCACCAAUCUGGUACGA	1.79	1.71	1.34	1.55	1.27	dme-miR-277, cel-miR-232	PCR
bxy-miR-29	AGCACC	UAGCACCAUGUGAAGCUGCUCU	CGUGGUUUCAGAUGGUUUUGCGUUGGAUUCAGAGUUCGUAGCACCAUGUGAAGCUGCUCU	126.19	57.48	58.39	151.68	121.99	hsa-miR-29a/29b/29c, cel-miR-49/83	PCR
bxy-miR-40	CACCGG	UCACCGGGUUUACAUUCGCUGA	AGCGCAUGUGGCCGAGGUGGUGCAGUUCUGUGGCCAUCACCGGGUUUACAUUCGCUGA	20.51	15.21	0.96	7.34	19.15	cel-miR-35/36/37/38/39/40/41/42	PCR
bxy-miR-45	GACUAG	UGACUAGAUCCAUACUCAGCU	CUGGGUAUGCGUCUUAGUCAUACUGUUCACAACAAGGGUUAUGACUAGAUCCAUACUCAGCU	2466.18	2008.17	5810.13	2101.92	2793.87	cel-miR-44/45/61/247	PCR
bxy-miR-50	GAUAUG	UGAUAUGUCUAGUAUUCUUGGGUU	UGAUAUGUCUAGUAUUCUUGGGUUCUAGAUUCCUUUAGAGGCAACCCUAAUGCUGGGCAUAUCGGA	42.26	29.9	19.66	71.5	62.64	cel-miR-50/62/90	PCR
bxy-miR-72	GGCAAG	AGGCAAGAUGUUGGCAUAGCU	AGGCAAGAUGUUGGCAUAGCUGAGUGAACAUUGAAAUGCUUCAGCGAUGCCUCAGAUCGCCGCG	1184.51	503.24	395.4	1331.58	1322.72	cel-miR-72/73/74	PCR
bxy-miR-786	AAUGCC	UAAUGCCCUUCGAAAGUCUGAA	GAGAUUUCCGUCGAGCAUUUACACUACUGCUAAAGGCUGUAAUGCCCUUCGAAAGUCUGAA	38.24	94.34	0.37	27.2	36.87	cel-miR-786	PCR
bxy-miR-86	AAGUGA	UAAGUGAAUACUUUGCCACAGUCU	UAAGUGAAUACUUUGCCACAGUCUUAGAAUAUGGCAUAGCUGGGCCAAGGUUCGCUUAAAC	43.1	84.58	51.51	62.35	58.06	cel-miR-86/785	PCR
bxy-miR-9	CUUUGG	UCUUUGGUUAUCUAGUUGUAU	UCUUUGGUUAUCUAGUUGUAUGAGAUUAUAUUAUCACAUCAUAAAGCUGGAUGACCAAAAGA	1.13	2.52	0.01	1.58	1.48	hsa-miR-9, cel-miR-244	PCR
bxy-miR-9*	AAAGCU	UAAAGCUGGAUGACCAAAAGA	UCUUUGGUUAUCUAGUUGUAUGAGAUUAUAUUAUCACAUCAUAAAGCUGGAUGACCAAAAGA	20.82	20.89	0.49	14.4	33.65	dme-miR-79/1017,hsa-miR-320a/320b/320c/320d	PCR
bxy-novel-01	AAAUGU	AAAAUGUUAGGUCGUCCAAAAUG	AAAAUGUUAGGUCGUCCAAAAUGAAUACUGAUGGAGAAAUGGGGAUGUCAUUUGGCAACCUAACAUUUAG	0.53	2.31	3.65	1.1	0.81	dme-miR-985	PCR
bxy-novel-02	ACCCGU	AACCCGUAGAAUUUACUUUCGUU	AACCCGUAGAAUUUACUUUCGUUUUUCGACUAGAGACAACGAAGUAAUUUUUGCGGGUACC	807.65	88.41	410.77	949.32	748.73	cel-miR-51/52/53/54/55/56, dme-miR-100	PCR
bxy-novel-03	ACCCGU	AACCCGUGACCAUGUAGAGUUUUAC	AACCCGUGACCAUGUAGAGUUUUACUGUUAGUUCAGCUGUAAACUCUACUGGACGGGUACC	22.04	7.85	0.05	25.82	32.08	dme-miR-100, cel-miR-51/52/53/54/55/56	PCR
bxy-novel-03*	AACUCU	AAACUCUACUGGACGGGUACC	AACCCGUGACCAUGUAGAGUUUUACUGUUAGUUCAGCUGUAAACUCUACUGGACGGGUACC	5.68	9.92	0.06	1.73	3.08	hsa-miR-618	PCR
bxy-novel-04	AGAGAG	AAGAGAGCCACCUGUUGACAGUU	AAGAGAGCCACCUGUUGACAGUUGGAGCCAGAUUUAGAUACUGUCAUGGAGUUGCUCUCUUAA	23.22	5.26	2.32	23.2	33.14	dme-miR-281-1*/281-2*	PCR
bxy-novel-05	GAGAUU	UGAGAUUCUUUUUCUUCAUUUGA	AAGUGAAGAAAAGAAUUUCGCUGUGCCUUUGAGGCGUAUUCUACAAGUGAGAUUCUUUUUCUUCAUUUGA	1.29	1.25	0.13	1.65	0.67	dme-miR-958	PCR
bxy-novel-06△	AUAUCU	AAUAUCUGAAAAGUUGGUGUG	AAUAUCUGAAAAGUUGGUGUGGCGUGCCAAACGACGAGUUUGCGCACAUUCAGACGCCAGACGACUUUUCCAGGUAUAAC	118.03	121.04	16.3	112.94	86.03	--	PCR
bxy-novel-07	GAGAUC	UGAGAUCAUAGAUUUAGGGUAC	ACCCUUAAUCUGUGUAUUUCAUCGAGGGUUUUGGUUGAUGAGAUCAUAGAUUUAGGGUAC	451.33	953.55	228.63	525.1	572.52	cel-miR-1834/80/81/82, dme-bantam	PCR
bxy-novel-08△	GCACUC	AGCACUCGACGUAUGAAAUCGUUU	AGCACUCGACGUAUGAAAUCGUUUCAAUGCGCAGCAAUUCGGGUAAACAUUUCACACCGAGUGCUAC	2.19	2.83	1.17	4.94	3.12	--	PCR
bxy-novel-09△	UUGCGA	UUUGCGACUGUUUUCAGGCCUUU	AGGCCUGAAACGGUGCCAAAUUCAGAUCAAAUGCAAGGUAAUUUGCGACUGUUUUCAGGCCUUU	87.49	704.84	86.19	64.14	55.97	--	PCR
bxy-novel-10△	CCAGUU	UCCAGUUCGAGAUGACGCCU	AGGUGUCAUCUCGAAGUGGCGAUGACACCUACAUCUCCAGUUCGAGAUGACGCCU	0.76	0.29	0	0	3.24	--	miRDeep454
bxy-novel-11	GAGGUA	UGAGGUAUUGUCAUCAUGUCUAU	AGUCAUGAUGAAAUAGCUACAGCGAGAAUCAGCCUGGCAGCUGAGGUAUUGUCAUCAUGUCUAU	493.95	596.52	331.63	509.86	567.01	cel-miR-793	PCR
bxy-novel-12	AAGUGA	UAAGUGAACCUUCGGGACUCG	AGUUCCCUACGGAUUCACUUACGCUGAUCUCAGAAUCCGGGUCGUAAGUGAACCUUCGGGACUCG	31.23	45.27	3.58	23.24	25.25	cel-miR-86/785	PCR
bxy-novel-13	GAGAUC	UGAGAUCAGACUAGACUCAUCU	AUGGGUCUAGCUUGGUGUCCAUGUUGUUUUUGUCAUGAGAUCAGACUAGACUCAUCU	457.93	174.38	127.88	441.11	433.63	cel-miR-1834/80/81/82, dme-bantam	PCR
bxy-novel-14	AAUCUC	CAAUCUCAACGAGUGAAGAGUGA	CAAUCUCAACGAGUGAAGAGUGAGGGACAUCGACGUCACUCUUGCUCGUUCGGGGUUCGC	2.64	2.21	1.57	2.88	2.07	cel-miR-259, dme-miR-304	PCR
bxy-novel-15	AUGGCA	AAUGGCACCUUCAUCCGUGUG	CACGAAUGAAGAGUGGUCAUCUCGAGAGUUCUGAAGCAGAAAUGGCACCUUCAUCCGUGUG	4.51	4.6	1.31	2.36	2.22	cel-miR-228,hsa-miR-183	PCR
bxy-novel-16	AUUAUG	UAUUAUGCACCCUUGAUUGCUU	CCAGUCAAUGGCGCAUAAAAUCGUUAAGAUACGAGGAAUAUUGCAGAUAUUAUGCACCCUUGAUUGCUU	6.65	4.66	2.8	4.69	6.65	cel-miR-60	PCR
bxy-novel-17	CACCGG	UCACCGGGGAUUUAUUGGGCGA	CCCCUUAUAAAUCCUUGUUGAUAGUGAUUCGCAGCGUAUCACCGGGGAUUUAUUGGGCGA	1.07	1.91	0	0.41	1.26	cel-miR-35/36/37/38/39/40/41/42	miRDeep454
bxy-novel-18	GAGAUC	UGAGAUCAAAGGUUUUAGGGUAU	CCCUGGAGCCAUUGAUAUCAUUUUGAAGAAGAAAGAAUGAGAUCAAAGGUUUUAGGGUAU	5579.12	11926.2	8567.34	6811.25	8219.18	cel-miR-1834/80/81/82, dme-bantam	PCR
bxy-novel-19	UAAAAG	GUAAAAGUGCCGGUACUUUCGUU	CGGAAGGACCGCAUUUUUAACCACUAGAGACAAGUUGAGGAUGGUAAAAGUGCCGGUACUUUCGUU	0.39	1.39	1	0.36	0.25	dme-miR-1013	PCR
bxy-novel-20	GAUAUG	UGAUAUGUGCGUUGUUGGCUGCU	CGGUCAACAUCCACAAAUCAUGCUGUUGUUGGUAUUGGCCAUGAUAUGUGCGUUGUUGGCUGCU	120.6	127.7	91.17	136.32	104.66	cel-miR-50/62/90, dme-miR-190	PCR
bxy-novel-21△	GGGGCG	GGGGGCGAAAUAGGAUCGACA	GCGGUACCCGGCGCCUCCACCAAAAACCGGUCGGUCGAUGUCAGACCGGCUUUUGAUGGGGGCGAAAUAGGAUCGACA	1.01	0	0.04	0.32	0.84	--	miRDeep454
bxy-novel-22	CACCGG	UCACCGGGAGAUAUAACAAGCAA	GCUUGUUAUACUCCUAGUGUUUGUGGUUGGGGGCAAAUCACCGGGAGAUAUAACAAGCAA	48.17	140.48	2.75	63.32	96.38	cel-miR-35/36/37/38/39/40/41/42	PCR
bxy-novel-23△	AUAGGA	UAUAGGAAAUGCGUCACAAGCGAU	GGCUUUUGACCAUUUCCUCAUAUGUUGAACAGGCACCGCUUCCGGCGGUUAAACUUCAUAUAGGAAAUGCGUCACAAGCGAU	11.77	25.44	1.7	6.9	8.11	--	PCR
bxy-novel-24	AAGGCA	UAAGGCACGCCAAUGUUUCUU	UAAGGCACGCCAAUGUUUCUUACCAGAAGAAACACGUAAGGGCGUAAGAAAAUUGAGUGCCUUAG	5.78	4.99	8.25	10.71	3.86	cel-miR-124, dme-miR-124	PCR
bxy-novel-25	ACAAUA	UACAAUAAAGAGUAUACUGGAUU	UACAAUAAAGAGUAUACUGGAUUUUCUCGCUGUGUAAAUCUGUAUACUUUUUUAUUGUAGA	1.91	1.26	0.57	4.01	2.69	hsa-miR-338-5p	PCR
bxy-novel-26	CACCGG	UCACCGGGGAAUGUUUGCGGCAA	UCAAGCAUCUUACGGUAGAUUGAGAUCUCUUUGGUCAAUCACCGGGGAAUGUUUGCGGCAA	1.19	1.12	0.06	0.71	1	cel-miR-35/36/37/38/39/40/41/42	miRDeep454
bxy-novel-27	GGCAGU	UGGCAGUGUGGUUAGCUGGUUG	UGGCAGUGUGGUUAGCUGGUUGCUAAUCACACCGUAAUAGAGUCAACAGCUAUCAGCACUGCCUGC	94.21	157.3	885.28	87.99	60.24	cel-miR-1824/34, dme-miR-34	PCR
bxy-novel-28△	AAAAUG	UAAAAUGGCUGUCAGGUGUAAU	UUACACACGACCGGUUAUUUUGCACAAUAACGGGUUGUAAAAUGGCUGUCAGGUGUAAU	3.67	0	7.03	5.24	6.23	--	PCR
bxy-novel-29	AGUAUC	AAGUAUCAGUCCGUCGGGAAAA	UUCCCGACAGACCAAUUAGAGGGAUAACCAAGUAUCAGUCCGUCGGGAAAA	0.01	0	0	0	0.09	cel-miR-257	miRDeep454
bxy-novel-30△	ACUGGU	AACUGGUCGUCAAAAUCAAAAG	UUUGAUUUUGACGACCAGUUGAGCCAUAAUAGCCUUAUGACUUCAGAGGUUGGGCCAACUGGUCGUCAAAAUCAAAAG	1.22	0.67	0.07	0	6.65	--	PCR
bxy-novel-31	UUGUAC	UUUGUACUCGCCAAGGUUUUCUGC	UUUGUACUCGCCAAGGUUUUCUGCGAGAUCGAAACAGCUGCAGAGUCUUGGUAAGUGCAAGGG	14.38	33.24	3.6	16.94	22.37	cel-miR-238/239a/239b, dme-miR-305	PCR
bxy-novel-32△	UUUCAU	UUUUCAUGCCUUUGUAUUCAUA	UUUUCAUGCCUUUGUAUUCAUACUUAGUCCAAUAGGGUUAUGAAUACAAAUUCAUGAAUUCC	0.88	0.9	0	0.5	0.56	--	PCR
bxy-novel-33-3p	AAGCUC	UAAGCUCAAAUUCGCAGGUAUA	CCCCUGUAGAAUUGAGCUUAUCUCUUCUAAUUUAUGGUAAUAAGCUCAAAUUCGCAGGUAUA	54.45	51.21	58.58	60.06	33.88	cel-miR-231/787.dme-miR-1007	PCR
bxy-novel-33-5p	CCCUGU	CCCCUGUAGAAUUGAGCUUAUC	CCCCUGUAGAAUUGAGCUUAUCUCUUCUAAUUUAUGGUAAUAAGCUCAAAUUCGCAGGUAUA	48.74	20.6	33.24	57.26	46.05	dme-miR-10*,hsa-miR-1274b/339-5p	PCR
Note: miRDeep454, precursor predicted using miRDeep (Friedlander et al.2008) and verified by e-PCR in a 454/Roche sequenced B. xylophilus genome dataset
