# Supplementary material for: MicroRNA Discovery and Analysis of Pinewood Nematode Bursaphelenchus xylophilus by Deep Sequencing
Source: PLoS One. 2010 Oct 12;5(10):e13271. doi: 10.1371/journal.pone.0013271 (PMC2953492; doi:10.1371/journal.pone.0013271)
Supplement: Table S8 — List of Primers for RT-qPCR. (0.01 MB XLS) [file pone.0013271.s010.xls]

## Sheet: Sheet1
Supplemental Table S8 List of Primers for RT-qPCR
NAME	FORWARD_PRIMER	REVERSE_PRIMER
Hsp12	GTCCGTTCCATTGACTCACG	GGTGTAAAGAAGGAGGCATCG
Hsp-70	CCTCTGTCGTTGGGTATTGA	GGGTTGGTTGTCGGAGTAAG
Actin	ACCGCTGCCTCCTCTTCTTC	TAGGTGGTCTCGTGGATACC
